# Supplementary material for: A novel donor–acceptor alternating copolymer based on angular-shaped benzo[2,1-b:3,4-b′]diselenophene for bulk heterojunction solar cells
Source: Royal Society of Chemistry journal article supplement (doi:10.1039/c4py01519c), 2014-12-02
Supplement: c4py01519c1.pdf [file c4py01519c1.pdf]

**A Novel Donor-Acceptor Alternating Copolymer Based on Angular-shaped  
Benzo[2,1-b:3,4-b']diselenophene for Bulk Heterojunction Solar Cells**

Youyu Jiang, Mingyan Yang, Xuan Huang, Jianhong Gao, Chun Zhan, Shengqiang

Xiao\*

State Key Laboratory of Advanced Technology for Materials Synthesis and  
Processing, WUT-USG Joint Laboratory of Advanced Optoelectronic Materials  
and Devices, Wuhan 430070, P. R. China

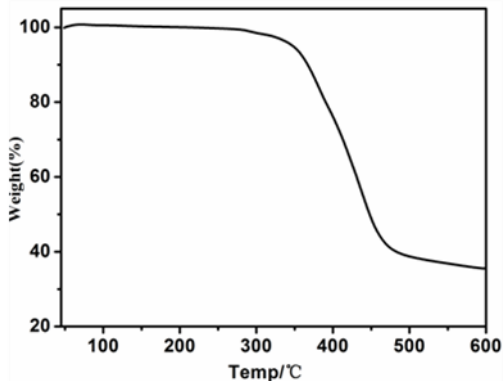

**Figure S1.** TGA curve of **PBDSe-DTBT** at a heating rate of  $10\text{ }^{\circ}\text{C min}^{-1}$  under nitrogen flow.

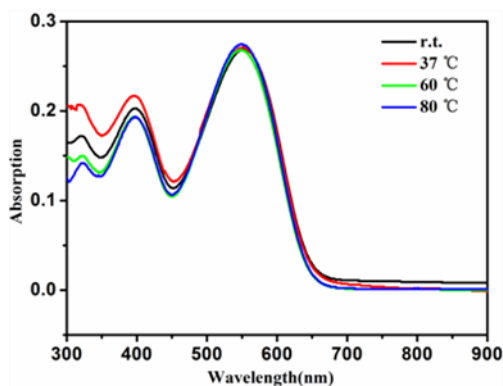

**Figure S2.** Absorption spectra of **PBDSe-DTBT** in *o*-DCB solutions at different temperature.

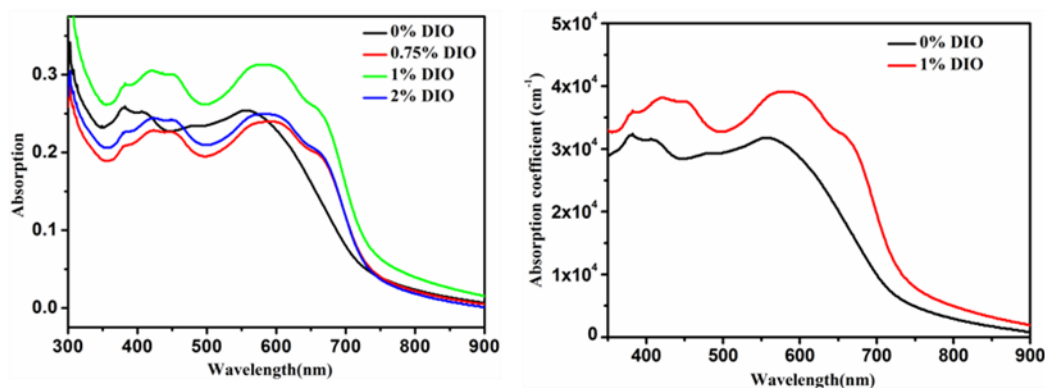

**Figure S3.** Absorption spectra of **PBDSe-DTBT**:  $\text{PC}_{71}\text{BM}$  blend films with different amounts of DIO (left), and absorption coefficients of blend films without DIO and with 1% DIO under optimized device conditions.

**Table S1** Photovoltaic properties of the various ratio of **PBDSe-DTBT**: $\text{PC}_{71}\text{BM}$  BHJs at different blend film thickness with different amounts of DIO additive.

| <b>PBDSe-DTBT</b>         |            |                 |                              |                              |                  |            |
|---------------------------|------------|-----------------|------------------------------|------------------------------|------------------|------------|
| <b>:PC<sub>71</sub>BM</b> | <b>DIO</b> | <b><i>d</i></b> | <b><i>V</i><sub>oc</sub></b> | <b><i>J</i><sub>sc</sub></b> | <b><i>FF</i></b> | <b>PCE</b> |
| (weight ratio)            | (% v/v)    | (nm)            | (V)                          | (mA cm <sup>-2</sup> )       |                  | (%)        |
| 1:0.8                     | 0          | 90              | 0.75 ± 0.02                  | 7.78 ± 0.26                  | 0.33 ± 0.01      | 1.9 ± 0.1  |
| 1:1                       | 0          | 80              | 0.82 ± 0.01                  | 8.90 ± 0.45                  | 0.37 ± 0.01      | 2.7 ± 0.1  |
| 1:1.5                     | 0          | 75              | 0.77 ± 0.02                  | 8.02 ± 0.66                  | 0.36 ± 0.01      | 2.2 ± 0.2  |
| 1:2                       | 0          | 77              | 0.82 ± 0.01                  | 8.12 ± 0.53                  | 0.33 ± 0.01      | 2.2 ± 0.1  |
|                           | 0.75       | 70              | 0.80 ± 0.01                  | 8.44 ± 0.43                  | 0.52 ± 0.01      | 3.5 ± 0.2  |
|                           | 1          | 74              | 0.80 ± 0.01                  | 12.30 ± 0.35                 | 0.57 ± 0.01      | 5.6 ± 0.2  |
| 1:1                       | 1.25       | 76              | 0.80 ± 0.01                  | 11.38 ± 0.71                 | 0.56 ± 0.01      | 5.1 ± 0.3  |
|                           | 1.5        | 74              | 0.78 ± 0.01                  | 10.66 ± 0.69                 | 0.56 ± 0.01      | 4.7 ± 0.3  |
|                           | 2          | 78              | 0.78 ± 0.01                  | 10.93 ± 0.39                 | 0.56 ± 0.01      | 4.8 ± 0.1  |

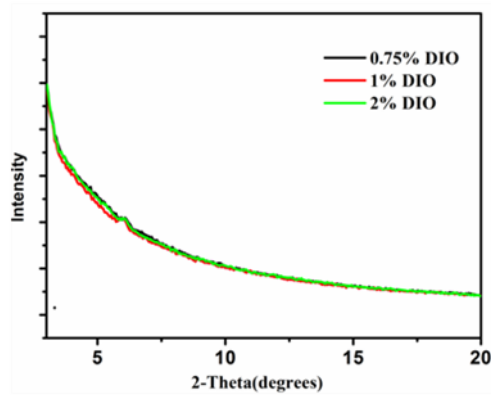

**Figure S4.** Out-of-plane X-ray profile spectra of pristine **PBDSe-DTBT** and BHJ blend films.

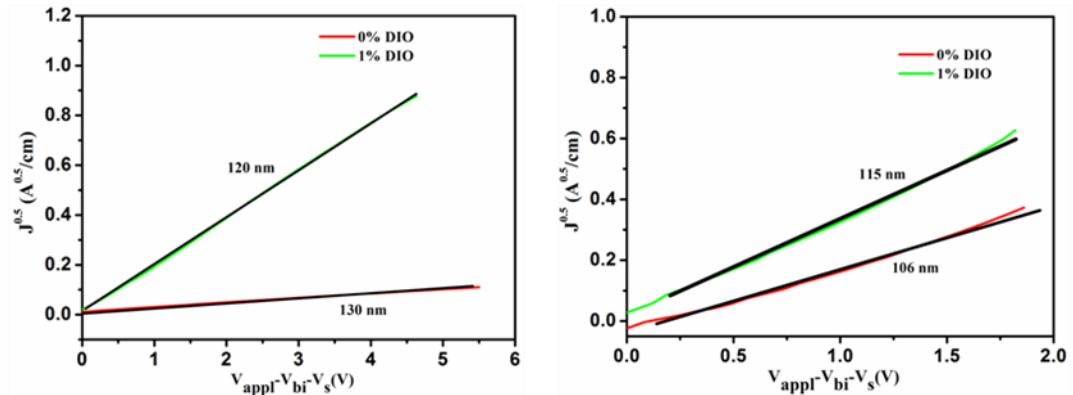

**Figure S5.**  $J^{0.5}$  vs  $V_{\text{appl}}$  plots for hole only devices of ITO/PEDOT: PSS (40 nm)/polymers: PC<sub>71</sub>BM /Pd(50 nm) (left) and electron only devices of glass/Al(80 nm)/PBDSe-DTBT: PC<sub>71</sub>BM/ Ca(20 nm)/Al(80 nm)

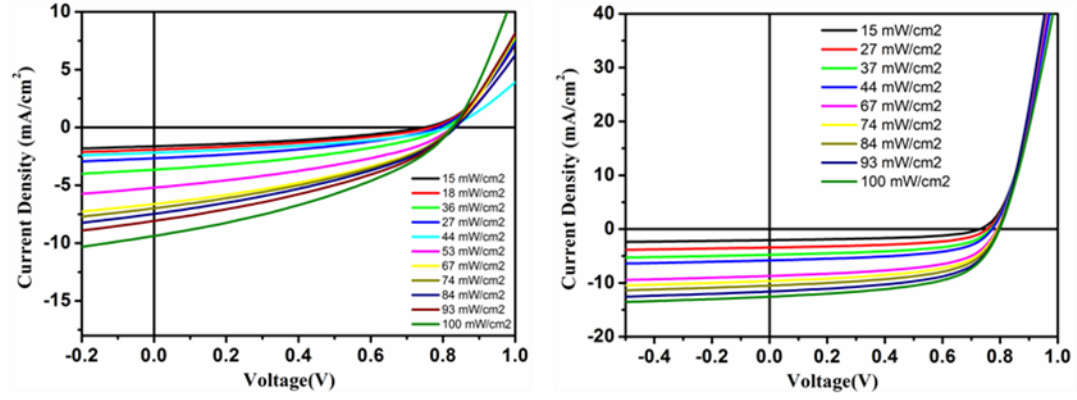

**Figure S6.** J-V characteristics of PBDSe-DTBT: PC<sub>71</sub>BM solar cells with 0% DIO (left) and 1% DIO (right) under various light intensities.
